# Supplementary material for: Pinpointing genes underlying annual/perennial transitions with comparative genomics
Source: BMC Genomics. 2016 Nov 15;17:921. doi: 10.1186/s12864-016-3274-1 (PMC5111240; doi:10.1186/s12864-016-3274-1)
Supplement: Additional file 1: Table S1. — Information on D. nemorosa, D. hispanica, A. parviflora, A. verna and A. montbretiana including their accession numbers, source locations and donor. (XLSX 186 kb) [file 12864_2016_3274_MOESM1_ESM.xlsx]

## Sheet: Sheet1
Taxon	original accession number	source location	donor
Draba nemorosa L.	B-2002-0157	02/23/1448/2; BG Berlin1 / Dahlem; Turkey, Artvin Province, Kackar Mountains, 2100m	HEID
Draba hispanica Boiss.	B-2006-0510	06/216/132/1; BG Innsbruck; Morocco, High Atlas, Jbel Toubkal, 2200m	HEID
Aubrieta parviflora	B-2012-0618-1	06/341/3800/3; Madrid2; Banco de Germoplasma Vegetal-UPM "César Gómez Campo"	HEID
Arabis verna (L.) R. Br.	2006-1039	No. 1616-68, Gomez Campo Collection Madrid; Spain, calcareous soil, near Ronda, Málaga	HEID
Arabis montbretiana Boiss.	B.Mutlu 5948	Turkey, Antalya, shore of Olimpos Natioanl Park, between Yaylakzudere-Tahtal, 1000m, 11/06/2000	Birol Mutlu, Inonu University
